# Supplementary material for: The Lipid-Modulating Effect of Tangeretin on the Inhibition of Angiopoietin-like 3 (ANGPTL3) Gene Expression through Regulation of LXRα Activation in Hepatic Cells
Source: MDPI journal article supplement (doi:10.3390/ijms22189853), 2021-09-12
Supplement: s1 [file s1]

**Table S1.** The top 50 of enriched GO terms with most significant *p* value in tangeretin-treated HepG2 cells

| ID         | Description                                                    | <i>p</i> value |
|------------|----------------------------------------------------------------|----------------|
| GO:0015711 | organic anion transport                                        | 0.000196631    |
| GO:0006820 | anion transport                                                | 0.000372626    |
| GO:0038084 | vascular endothelial growth factor signaling pathway           | 0.000460256    |
| GO:0072330 | monocarboxylic acid biosynthetic process                       | 0.000538243    |
| GO:0033554 | cellular response to stress                                    | 0.000720838    |
| GO:0033044 | regulation of chromosome organization                          | 0.000722807    |
| GO:0042760 | very long-chain fatty acid catabolic process                   | 0.001045247    |
| GO:0070482 | response to oxygen levels                                      | 0.001135024    |
| GO:0001666 | response to hypoxia                                            | 0.001172772    |
| GO:0071827 | plasma lipoprotein particle organization                       | 0.001263218    |
| GO:0043687 | post-translational protein modification                        | 0.001533743    |
| GO:0045861 | negative regulation of proteolysis                             | 0.001609589    |
| GO:0043691 | reverse cholesterol transport                                  | 0.001718139    |
| GO:0006996 | organelle organization                                         | 0.001743339    |
| GO:0006629 | lipid metabolic process                                        | 0.001883977    |
| GO:0000725 | recombinational repair                                         | 0.001942245    |
| GO:0006260 | DNA replication                                                | 0.0019534      |
| GO:0002933 | lipid hydroxylation                                            | 0.00201535     |
| GO:0015838 | amino-acid betaine transport                                   | 0.00201535     |
| GO:0046942 | carboxylic acid transport                                      | 0.002027223    |
| GO:0006082 | organic acid metabolic process                                 | 0.002275632    |
| GO:0015910 | peroxisomal long-chain fatty acid import                       | 0.002333011    |
| GO:0032902 | nerve growth factor production                                 | 0.002333011    |
| GO:0038190 | VEGF-activated neuropilin signaling pathway                    | 0.002333011    |
| GO:0050722 | regulation of interleukin-1 beta biosynthetic process          | 0.002333011    |
| GO:0050725 | positive regulation of interleukin-1 beta biosynthetic process | 0.002333011    |
| GO:1902336 | positive regulation of retinal ganglion cell axon guidance     | 0.002333011    |
| GO:0048519 | negative regulation of biological process                      | 0.002637618    |
| GO:0006950 | response to stress                                             | 0.002680827    |
| GO:0035725 | sodium ion transmembrane transport                             | 0.002827659    |
| GO:0003333 | amino acid transmembrane transport                             | 0.002864812    |
| GO:0015849 | organic acid transport                                         | 0.002908723    |
| GO:0032787 | monocarboxylic acid metabolic process                          | 0.002997776    |
| GO:0006633 | fatty acid biosynthetic process                                | 0.003089983    |

|            |                                                                  |             |
|------------|------------------------------------------------------------------|-------------|
| GO:0010876 | lipid localization                                               | 0.003179142 |
| GO:0019752 | carboxylic acid metabolic process                                | 0.003280088 |
| GO:0035726 | common myeloid progenitor cell proliferation                     | 0.003400407 |
| GO:0051004 | regulation of lipoprotein lipase activity                        | 0.003449952 |
| GO:2000573 | positive regulation of DNA biosynthetic process                  | 0.003486182 |
| GO:0050930 | induction of positive chemotaxis                                 | 0.003674025 |
| GO:0046394 | carboxylic acid biosynthetic process                             | 0.003766843 |
| GO:0031638 | zymogen activation                                               | 0.004223633 |
| GO:0035924 | cellular response to vascular endothelial growth factor stimulus | 0.004817653 |
| GO:0009611 | response to wounding                                             | 0.004843104 |
| GO:0010951 | negative regulation of endopeptidase activity                    | 0.004999759 |
| GO:0000724 | double-strand break repair via homologous recombination          | 0.005101266 |
| GO:0021800 | cerebral cortex tangential migration                             | 0.00524607  |
| GO:0071679 | commissural neuron axon guidance                                 | 0.00524607  |
| GO:0048048 | embryonic eye morphogenesis                                      | 0.005272766 |
| GO:0030071 | regulation of mitotic metaphase/anaphase transition              | 0.005472417 |
